# Supplementary material for: Synthesis and Characterization of a Self-Polycondensation Diazaphthalanone Monomer and Its Polymers from Polycondensation Reactions
Source: MDPI journal article supplement (doi:10.3390/polym14183904), 2022-09-19
Supplement: s1 [file s1]

# Supporting Information

## Synthesis and Characterization of a self-Polycondensation diazaphthalanone monomer and Its Polymers from Polycondensation Reactions

Xin Liu <sup>1</sup>, Xiaozhou Zhang <sup>1,2,\*</sup>, Jiawei Jiang <sup>1</sup>, Hongge Jia <sup>1,2</sup>, Xigao Jian <sup>3</sup> and Jinyan Wang <sup>3</sup>

<sup>1</sup> College of Materials Science and Engineering, Qiqihar University, Wenhua Street 42, Qiqihar 161006, China

<sup>2</sup> Heilongjiang Province Key Laboratory of Polymeric Composition Material, Qiqihar 161006, China

<sup>3</sup> Department of Polymer Science & Engineering, Dalian University of Technology, Dalian 116024, China

\* Correspondence: zhangxzh-n@163.com

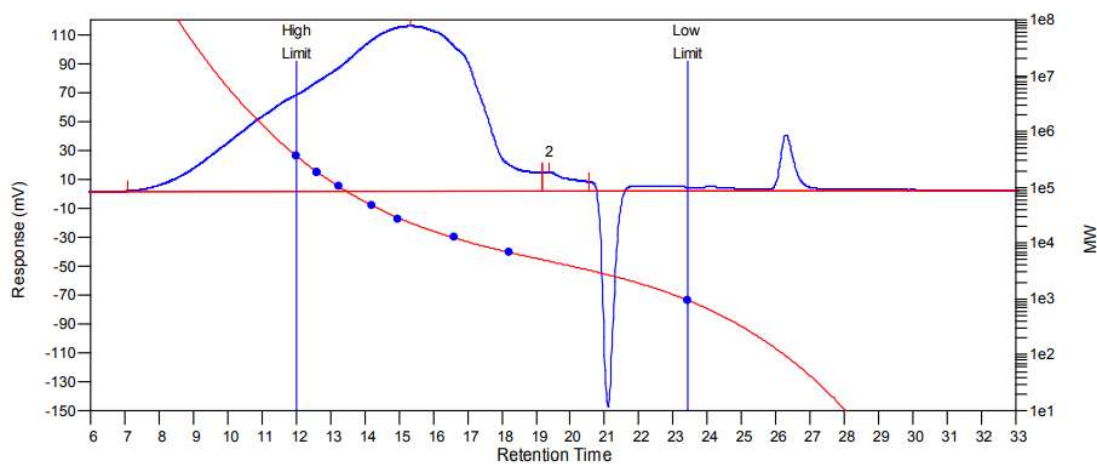

Figure S1. GPC of PCDD

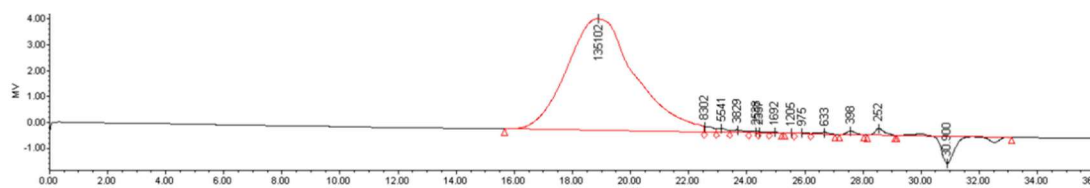

**Figure S2.** GPC of PBCD

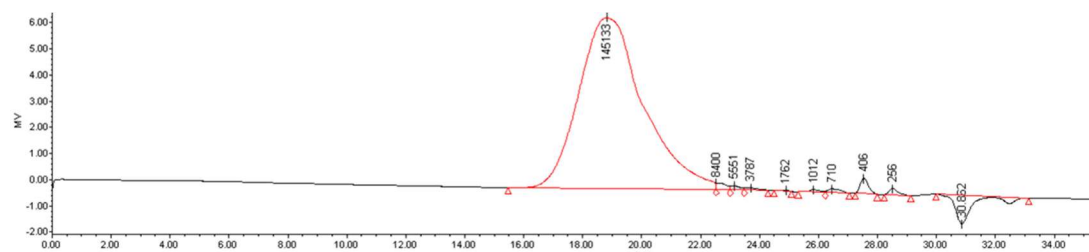

**Figure S3.** GPC spectra of PBD
